# Supplementary material
Source: PubMed Central journal article supplement (PMC2387080)
Supplement: NIHMS46461-supplement-supplement_1.pdf [file NIHMS46461-supplement-supplement_1.pdf]

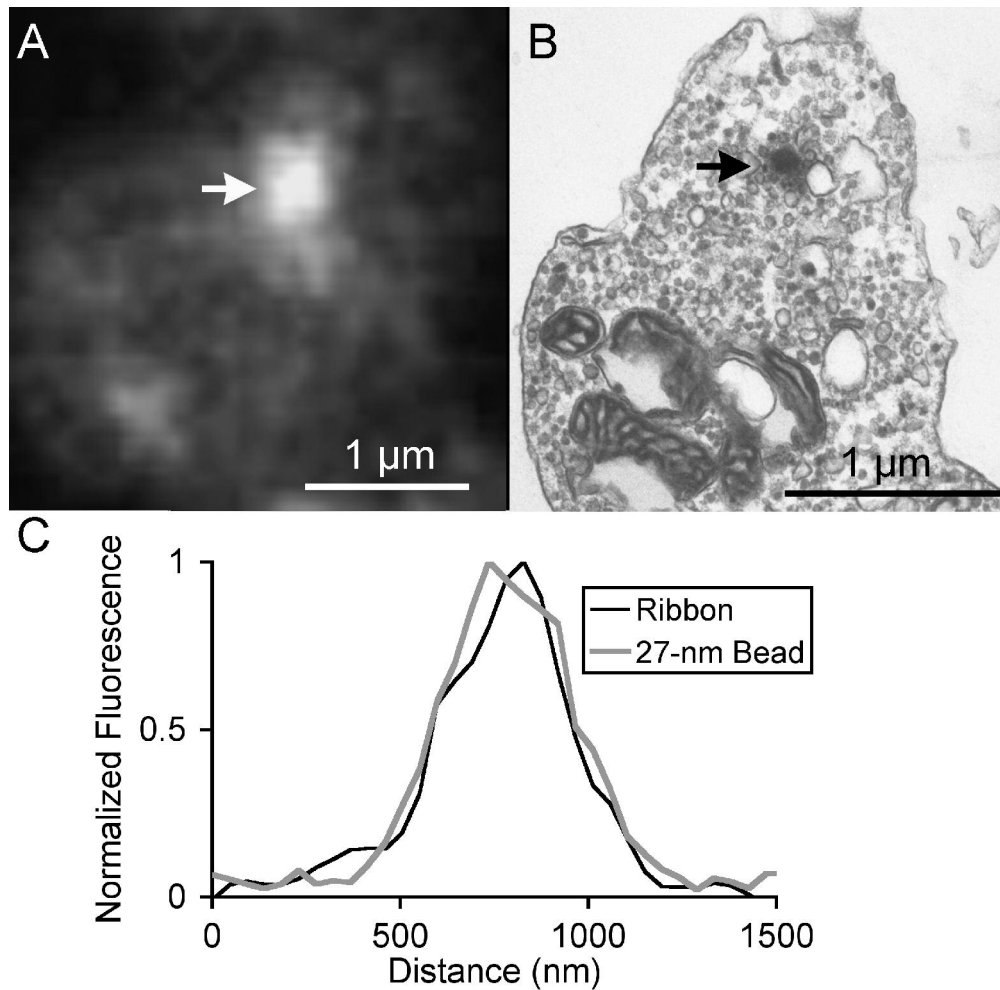

**Supplemental Figure S1. Fluorescence image of ribbons marked with RIBEYE-binding peptide are limited by the point-spread function of the microscope. A. Image of a ribbon (arrow) in the synaptic terminal of a living bipolar neuron, marked with fluorescein-Rpep. B. EM view of the same terminal, showing a synaptic ribbon at the corresponding position (arrow). C. Spatial profile of fluorescence, measured using Plot Profile function of ImageJ, for the synaptic ribbon shown in A (black line), compared with fluorescence of a 27-nm fluorescent bead (gray line) to show the point-spread function of the microscope under the same imaging conditions.**
